# Supplementary material
Source: PubMed Central journal article supplement (PMC1501280)
Supplement: neo0706_0603SD1.pdf [file neo0706_0603SD1.pdf]

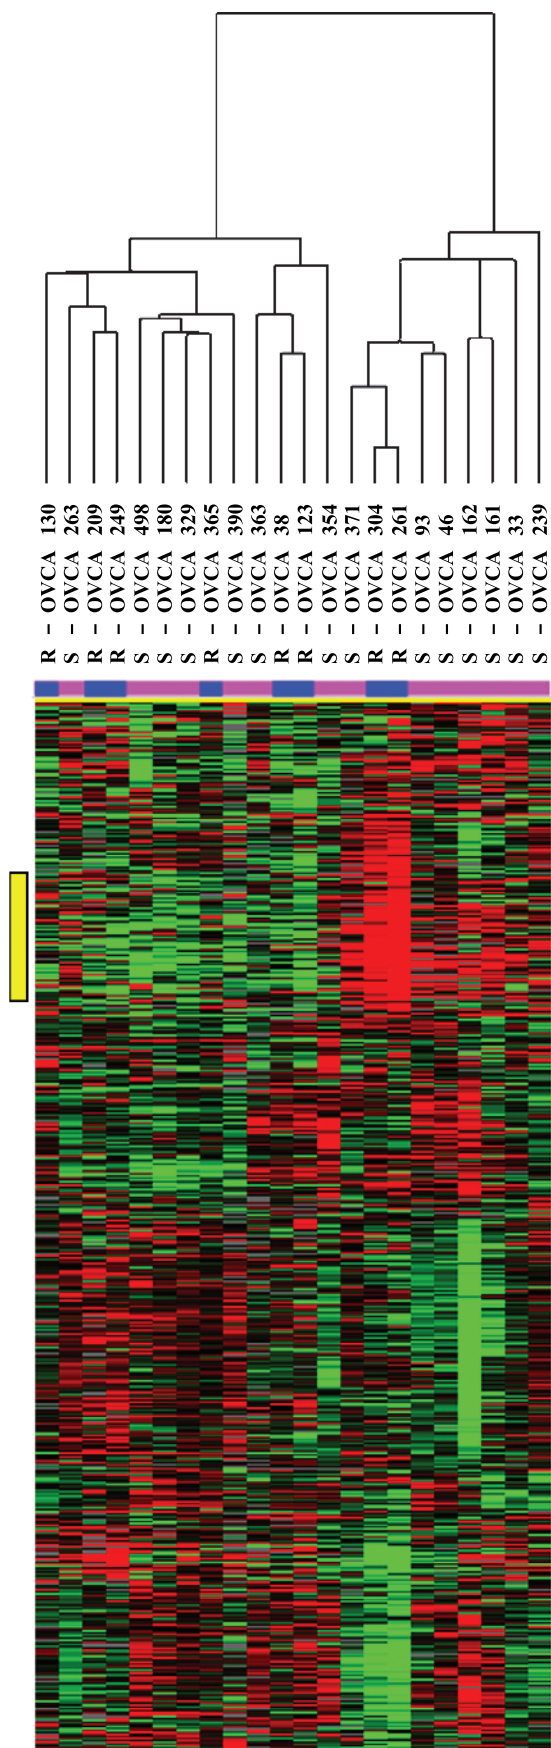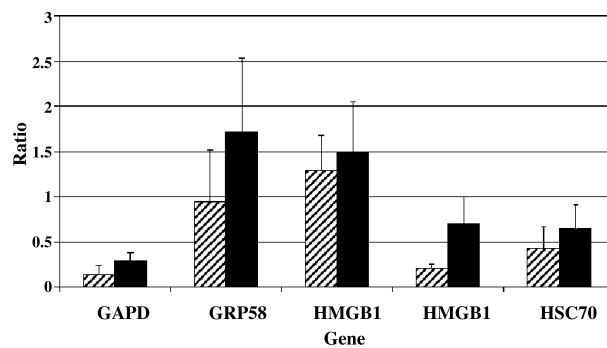

**Figure W2.** Validation by real-time RT-PCR of members of the nuclear complex. Arithmetic means representing relative expressions of each gene in the resistant and sensitive groups are depicted with hashed (▨) and solid (■) bars, respectively. Expression levels were calibrated against Human Universal Reference. The error bars represent standard deviation.

**Figure W1.** Analysis of 22 samples using unsupervised hierarchical clustering. Sensitive (S; pink) and resistant (R; blue) samples are interspersed throughout the dendrogram. Relative expression levels of genes are depicted in green (down), red (up), black (no change), or grey (data missing). The yellow vertical bar highlights a major gene cluster within which most genes identified as differentially expressed between the sensitive and resistant groups by SAM analysis were localized.

**Table W1.** Genes Identified by SAM\* Analysis that are Differentially Expressed between the Resistant and Sensitive Groups.

| Clone ID          | Fold Change <sup>†</sup> | Name                                                                   | Gene Symbol | Cytoband |
|-------------------|--------------------------|------------------------------------------------------------------------|-------------|----------|
| UP <sup>‡</sup>   |                          |                                                                        |             |          |
| 296275            | 15.43                    | H19, imprinted maternally expressed untranslated mRNA                  | LOC283120   | 11p15.5  |
| 109357            | 4.73                     | placenta-specific 4                                                    | PLAC4       | 21q22.3  |
| 53087             | 3.65                     | hypothetical protein LOC283922                                         | LOC283922   | 16q22.3  |
| 158123            | 3.32                     | ATPase, H+ transporting, lysosomal 56/58kDa                            | ATP6V1B1    | 2p13.3   |
| 470393            | 3.29                     | matrix metalloproteinase 7                                             | MMP7        | 11q22.2  |
| 5301677           | 2.85                     | retinol binding protein 1, cellular                                    | RBP1        | 3q23     |
| 148914            | 2.76                     | Homo sapiens mRNA; cDNA DKFZp564B076                                   | N/A         | 6p21.1   |
| 29988             | 2.42                     | pre-B-cell leukemia transcription factor 1                             | PBX1        | 2q23.1   |
| 149421            | 2.09                     | dual specificity phosphatase 1                                         | DUSP1       | 5q35.1   |
| 2262605           | 2.07                     | Homo sapiens EMX2OS mRNA, complete sequence                            | N/A         | 10q26.11 |
| 501985            | 2.02                     | sphingosine-1-phosphate lyase 1                                        | SGPL1       | 10q22.1  |
| DOWN <sup>§</sup> |                          |                                                                        |             |          |
| 162892            | 10.39                    | Homo sapiens cDNA FLJ26905 fis                                         | N/A         | 22q11.22 |
| 146669            | 6.73                     | immunoglobulin lambda joining 3                                        | IGLJ3       | 22q11.22 |
| 308924            | 6.47                     | hemoglobin, epsilon 1                                                  | HBE1        | 11p15.4  |
| 293298            | 5.62                     | Homo sapiens IGL mRNA for immunoglobulin lambda light chain            | N/A         | 22q11.22 |
| 4701351           | 4.94                     | ferritin, light polypeptide                                            | FTL         | 19q13.33 |
| 5922013           | 4.84                     | tubulin, beta polypeptide                                              | TUBB        | 6p25.2   |
| 33203             | 4.77                     | tubulin, alpha 3                                                       | TUBA3       | 12q13.12 |
| 5784795           | 4.57                     | metallothionein 2A                                                     | MT2A        | 16q12.2  |
| 163221            | 4.56                     | Homo sapiens clone P2-114 anti-oxidized LDL immunoglobulin light chain | N/A         | 22q11.22 |
| 110243            | 4.47                     | Homo sapiens cDNA FLJ26905 fis, clone RCT01427, highly similar to      | N/A         | 22q11.22 |
| 300017            | 4.18                     | apolipoprotein B                                                       | APOB        | 2p24.1   |
| 5923231           | 4.10                     | RAN, member RAS oncogene family                                        | RAN         | 12q24.33 |
| 4876644           | 4.08                     | tubulin, beta, 5                                                       | TUBB5       | 19p13.3  |
| 261822            | 3.79                     | Homo sapiens, clone IMAGE:5728597                                      | N/A         | 22q11.23 |
| 503601            | 3.74                     | glyceraldehyde-3-phosphate dehydrogenase                               | WT1         | 11p13    |
| 184151            | 3.72                     | tubulin, beta, 4                                                       | TUBB4       | 16q24.3  |
| 33204             | 3.72                     | tubulin, beta polypeptide paralog                                      | MGC8685     | 6p25.2   |
| 303100            | 3.68                     | fibronectin 1                                                          | FN1         | 2q35     |
| 5762339           | 3.65                     | membrane targeting (tandem) C2 domain containing 1                     | MTAC2D1     | 14q32.12 |
| 198960            | 3.42                     | hemoglobin, gamma G                                                    | HBG2        | 11p15.4  |
| 470628            | 3.39                     | Homo sapiens cDNA clone IMAGE:5288757                                  | N/A         | 1p32.2   |
| 5926230           | 3.36                     | peroxiredoxin 1                                                        | PRDX1       | 1p34.1   |
| 229610            | 3.35                     | Homo sapiens transcribed sequence                                      | N/A         | 11p15.4  |
| 5749861           | 3.34                     | immunoglobulin lambda locus                                            | IGL@        | 22q11.22 |
| 5422775           | 3.32                     | ribosomal protein S5                                                   | RPS5        | 19q13.43 |
| 208059            | 3.27                     | heat shock 70kDa protein 8                                             | HSC70       | 11q24.1  |
| 5740157           | 3.26                     | tyrosine 3-monooxygenase/tryptophan 5-monooxygenase activation pro     | YWHAQ       | 2p25.1   |
| 5421424           | 3.19                     | enolase 1                                                              | ENO1        | 1p36.23  |
| 5454961           | 2.88                     | Homo sapiens transcribed sequence                                      | N/A         | 15q25.1  |
| 120559            | 2.87                     | metallothionein 1F                                                     | MT1F        | 16q12.2  |
| 5406583           | 2.82                     | H2A histone family, member Z                                           | H2AFZ       | 4q23     |
| 5806641           | 2.81                     | histone H2A.F/Z variant                                                | H2AV        | 15q26.1  |
| 212856            | 2.79                     | hemoglobin, zeta                                                       | HBZ         | 16p13.3  |
| 5925346           | 2.77                     | chromosome 7 open reading frame 17                                     | LOC51142    | 7p11.2   |
| 504180            | 2.75                     | Homo sapiens, clone IMAGE:5742072                                      | N/A         | 6p22.3   |
| 267145            | 2.74                     | high-mobility group box 2                                              | HMGB2       | 4q34.1   |
| 154975            | 2.69                     | Homo sapiens transcribed sequence                                      | N/A         | 22q11.22 |
| 471144            | 2.64                     | electron-transfer-flavoprotein, beta polypeptide                       | ETFB        | 19q13.41 |
| 307027            | 2.59                     | heterogeneous nuclear ribonucleoprotein A2/B1                          | HNRPA2B1    | 7p15.2   |
| 27920             | 2.57                     | mitogen-activated protein kinase kinase kinase 7 interacting protein 1 | MAP3K7IP1   | 22q13.1  |
| 297215            | 2.55                     | annexin A5                                                             | ANXA5       | 4q27     |
| 145972            | 2.54                     | KIAA0101 gene product                                                  | KIAA0101    | 15q22.31 |
| 5111837           | 2.52                     | cofilin 1                                                              | CFL1        | 11q13.1  |
| 5934101           | 2.50                     | pyruvate kinase, muscle                                                | PKM2        | 15q23    |
| 4734377           | 2.49                     | ubiquitin B                                                            | UBB         | 17p11.2  |
| 270551            | 2.48                     | CD44 antigen                                                           | CD44        | 11p13    |
| 155222            | 2.48                     | glutathione peroxidase 4                                               | GPX4        | 19p13.3  |
| 3546201           | 2.45                     | ribosomal protein L10                                                  | RPL10       | Xq28     |
| 5494320           | 2.45                     | heat shock 90kDa protein 1, alpha                                      | HSPCA       | 14q32.32 |
| 488225            | 2.44                     | ribosomal protein S19                                                  | RPS19       | 19q13.2  |
| 139590            | 2.43                     | RAN binding protein 1                                                  | RANBP1      | 22q11.21 |
| 29774             | 2.43                     | eukaryotic translation initiation factor 2                             | EIF2S2      | 2q31.1   |
| 341798            | 2.34                     | ubiquinol-cytochrome c reductase hinge protein                         | UQCRH       | 1p36.13  |
| 5809010           | 2.31                     | putative translation initiation factor                                 | SUI1        | 17q21.2  |
| 5533075           | 2.30                     | small nuclear ribonucleoprotein polypeptides B and B1                  | SNRFB       | 20p13    |
| 490368            | 2.29                     | ribosomal protein S16                                                  | RPS16       | 19q13.2  |
| 489898            | 2.27                     | nuclease sensitive element binding protein 1                           | NSEP1       | 1p34.2   |
| 300041            | 2.26                     | non-metastatic cells 1                                                 | NME1        | 17q21.33 |

(continued on next page)

Table W1. (continued).

| Clone ID | Fold Change <sup>†</sup> | Name                                                                | Gene Symbol  | Cytoband |
|----------|--------------------------|---------------------------------------------------------------------|--------------|----------|
| 343295   | 2.25                     | lectin, galactoside-binding, soluble, 1 (galectin 1)                | LGALS1       | 22q13.1  |
| 138280   | 2.23                     | DKFZp564J157 protein                                                | DKFZP564J157 | 12q13.13 |
| 3916469  | 2.23                     | NHP2 non-histone chromosome protein 2-like 1                        | NHP2L1       | 22q13.2  |
| 5540049  | 2.22                     | Homo sapiens transcribed sequence                                   | HCP15        | 7p15.3   |
| 5475005  | 2.22                     | Homo sapiens similar to ribosomal protein L18a                      | RPL18A       | 19p13.11 |
| 4126974  | 2.22                     | malate dehydrogenase 2, NAD                                         | MDH2         | 7q11.23  |
| 230534   | 2.22                     | hemoglobin, alpha 2                                                 | HBA1         | 16p13.3  |
| 5785893  | 2.21                     | ATP synthase, H+ transporting, mitochondrial F0 complex, subunit c  | ATP5G3       | 2q31.1   |
| 5431259  | 2.21                     | glyceraldehyde-3-phosphate dehydrogenase                            | GAPD         | 12p13.31 |
| 278772   | 2.21                     | stearoyl-CoA desaturase                                             | SCD          | 10q24.31 |
| 5770525  | 2.21                     | activating transcription factor 4                                   | ATF4         | 22q13.1  |
| 5932330  | 2.20                     | SH3 domain binding glutamic acid-rich protein like 3                | SH3BGRL3     | 1p36.11  |
| 5704441  | 2.20                     | DEAD (Asp-Glu-Ala-Asp) box polypeptide 5                            | DDX5         | 17q24.1  |
| 5528790  | 2.19                     | excision repair cross-complementing rodent repair deficiency, comp  | ERCC1        | 19q13.32 |
| 4762963  | 2.19                     | ribosomal protein S13                                               | RPS13        | 11p15.1  |
| 505381   | 2.19                     | syndecan 2                                                          | SDC2         | 8q22.1   |
| 4702445  | 2.19                     | ferritin, heavy polypeptide 1                                       | FTH1         | 11q12.3  |
| 5806598  | 2.18                     | keratin 8                                                           | KRT8         | 12q13.13 |
| 5927927  | 2.17                     | ribosomal protein L10a                                              | RPL10A       | 6p21.31  |
| 200573   | 2.16                     | CDC28 protein kinase regulatory subunit 1B                          | CKS1B        | 1q22     |
| 346784   | 2.15                     | alpha-2-HS-glycoprotein                                             | AHSG         | 3q27.3   |
| 209207   | 2.15                     | superoxide dismutase 1                                              | SOD1         | 21q22.11 |
| 295004   | 2.14                     | hepatoma-derived growth factor                                      | HDGF         | 1q23.1   |
| 137317   | 2.13                     | chromosome 6 open reading frame 49                                  | C6orf49      | 6p21.1   |
| 186682   | 2.13                     | trefoil factor 1                                                    | TFF1         | 21q22.3  |
| 5788140  | 2.13                     | ras homolog gene family, member A                                   | ARHA         | 3p21.31  |
| 5420166  | 2.12                     | actin, alpha 2, smooth muscle, aorta                                | ACTA2        | 10q23.31 |
| 4772211  | 2.12                     | calmodulin 2                                                        | CALM2        | 2p21     |
| 4347418  | 2.10                     | high-mobility group nucleosome binding domain 1                     | HMGN1        | 21q22.2  |
| 5455241  | 2.09                     | solute carrier family 25                                            | SLC25A5      | Xq24     |
| 471551   | 2.09                     | Homo sapiens transcribed sequence                                   | N/A          | 8q13.2   |
| 505115   | 2.09                     | chaperonin containing TCP1, subunit 8 (theta)                       | CCT8         | 21q21.3  |
| 5927445  | 2.08                     | peroxiredoxin 6                                                     | PRDX6        | 1q25.1   |
| 200190   | 2.07                     | nascent-polypeptide-associated complex alpha polypeptide            | CA           | 12q13.3  |
| 151473   | 2.06                     | G1 to S phase transition 1                                          | GSPT1        | 16p13.13 |
| 221318   | 2.05                     | CDC28 protein kinase regulatory subunit 2                           | CKS2         | 9q22.2   |
| 5926362  | 2.04                     | solute carrier family 25 (mitochondrial carrier; phosphate carrier) | SLC25A3      | 12q23.1  |
| 4304010  | 2.04                     | stathmin 1/oncoprotein 18                                           | STMN1        | 1p36.11  |
| 5270796  | 2.03                     | syndecan binding protein                                            | SDCBP        | 8q12.1   |
| 504916   | 2.03                     | hypothetical protein MGC10812                                       | MGC10812     | 19p13.11 |
| 4279563  | 2.02                     | tissue factor pathway inhibitor 2                                   | TFPI2        | 7q21.3   |
| 172079   | 2.01                     | triosephosphate isomerase 1                                         | TPI1         | 12p13.31 |
| 503300   | 2.01                     | hypothetical protein LOC51315                                       | LOC51315     | 1p36.33  |
| 200586   | 2.00                     | metallothionein 1B                                                  | MT1B         | 16q12.2  |
| 23904    | 2.00                     | ELOVL family member 5, elongation of long chain fatty acids         | ELOVL5       | 6p12.1   |

N/A Not available.

\*SAM analysis with FDR 0.07-0.8%, fold change 2.

<sup>†</sup>Relative fold change between the two classes (resistant/sensitive).<sup>‡</sup>List of genes whose transcript levels are greater in the resistant compared to the sensitive group.<sup>§</sup>List of genes whose transcript levels are less in the resistant compared to the sensitive group.

**Table W2.** Test of Agreement between Expression Changers and Discriminate Genomic Regions.

| Expression Microarray                                       | BAC CGH*                |                                 |                       |      |
|-------------------------------------------------------------|-------------------------|---------------------------------|-----------------------|------|
|                                                             | Cytoband Regions Gained | Cytoband Regions with No Change | Cytoband Regions Lost |      |
| Number of Genes with Greater Transcript Levels <sup>†</sup> | 2 <sup>  **</sup>       | 10                              | 0                     | 12   |
| Number of Genes with No Change                              | 320                     | 6194 <sup>  </sup>              | 175                   | 6689 |
| Number of Genes with Lower Transcript Levels <sup>†</sup>   | 7                       | 95                              | 8 <sup>  **</sup>     | 110  |
| <b>TOTAL</b>                                                | 329                     | 6299                            | 183                   | 6811 |

Cohen's Kappa = 0.0230<sup>‡</sup>Test of H<sub>0</sub>: Kappa = 0:  $\kappa^{**} = 0.1316^{\S}$ \*Cytoband regions gained, lost, or with no change in the resistant compared to the sensitive group that were identified by the Fisher Exact test ( $P < 0.05$ ).<sup>†</sup>Genes whose transcript levels were determined to be significantly greater or lower in the resistant compared to the sensitive group by SAM analysis (FDR 0.7-0.08%, FC 2).<sup>‡</sup>Slight agreement between the expression and BAC CGH data ( $0 < \kappa^{**} < 1$ ).<sup>§</sup>Agreement does not exceed chance ( $\kappa^{**} < 1.96$ ).<sup>||</sup>Overall agreement between aCGH and expression data was 91%.<sup>\*\*</sup>8.2% of SAM changers agree with changes in copy number.**Table W3.** Overall Losses and Gains.

| Loss                                    | Gain                         |
|-----------------------------------------|------------------------------|
| 1p36.11-pter; 3p22.1-p21.31;            | 1q11-q25.3; 2p22.3-pter;     |
| 4p15.33-p16.1; 4p12-p14; 4q13.2-qter;   | 3q22.3-qter; 6p22.1-pter;    |
| 5q13.1-q23.3; 6q22.1-qter; 8p21.1-pter; | 6p21.1-p21.31; 7q31.33-qter; |
| 9p; 9q21.11-q33.1; 11p15.1-pter;        | 8q; 12p; 20p12.1-pter;       |
| 13q12.2-q21.1; 13q32.2-qter;            | 20q12-qter                   |
| 15q11.2-q15.1; 16q; 17p13.2-q11.2;      |                              |
| 17q21.32-q21.33; 18q21.1-qter; 22       |                              |
